# Cyclin A participates in the *TSO1-MYB3R1* regulatory module to maintain shoot meristem size and fertility in *Arabidopsis*

Fuxi Wang, Wanpeng Wang\* and Zhongchi Liu‡

## ABSTRACT

The stem cell pools at the shoot apex and root tip give rise to all the above- and below-ground tissues of a plant. Previous studies in *Arabidopsis* identified a *TSO1-MYB3R1* transcriptional module that controls the number and size of the stem cell pools at the shoot apex and root tip. As *TSO1* and *MYB3R1* are homologous to components of an animal cell cycle regulatory complex, DREAM, *Arabidopsis* mutants of *TSO1* and *MYB3R1* provide valuable tools for investigations into the link between cell cycle regulation and stem cell maintenance in plants. In this study, an *Arabidopsis* cyclin A gene, *CYCA3;4*, was identified as a member of the *TSO1-MYB3R1* regulatory module and *cyca3;4* mutations suppressed the *tso1-1* mutant phenotype specifically in the shoot. The work reveals how the *TSO1-MYB3R1* module is integrated with the cell cycle machinery to control cell division at the shoot meristem.

**KEY WORDS:** Cell cycle, Cyclin A, DREAM complex, MYB3R1, Shoot meristem, TSO1

## INTRODUCTION

Plant meristems are responsible for generating all above and below ground tissues. The identification of gene regulatory circuitries that confer and maintain the ‘stem cell’ property in plant meristems is therefore of fundamental importance. In plant shoot apical meristem (SAM), the *WUSCHEL (WUS)-CLAVATA (CLV)* negative-feedback loop maintains the stem cell pool and limits the meristem size. However, beyond the *WUS-CLV3* pathway, there have been limited studies of other regulatory pathways for SAM regulation, and little is known about how the plant meristem activities are integrated with the cell cycle regulation.

The DREAM/MMB complex is a master cell cycle regulator in both animals and plants (Kobayashi et al., 2015; Sadasivam and DeCaprio, 2013). The animal DREAM complex consists of retinoblastoma (RB)-like proteins (P107 and P130), E2Fs and their dimerization partners DP1-3 and the MuvB core (LIN9, LIN37, LIN52, LIN54 and RBBP4). In animal quiescent cells, the DREAM complex prevents cells from entering the cell cycle while in dividing cells, the MuvB core associates with B-Myb (also called MYBL2) instead of the Rb-like proteins to form the MMB complex that promotes the G2/M phase (Fischer and Müller, 2017). Recent studies revealed that the DREAM/MMB complexes also exist in

plants. The *Arabidopsis* genome possesses essentially all the homologous genes of the DREAM/MMB complex components, and the corresponding plant homologs can form similar complexes (Lang et al., 2021; Ning et al., 2020). Intriguingly, plants have more copies of each complex component. For example, there are eight *Arabidopsis* homologs of LIN54, named as *TSO1*, *SOL1*, *SOL2*, *TCX4*, *TCX5*, *TCX6*, *TCX7* and *TCX8*, all of which encode two cysteine-rich CXC motifs separated by a linker region (Andersen et al., 2007; Hauser et al., 2000; Song et al., 2000). *TCX5/6*-containing DREAM complexes in *Arabidopsis* act to preclude DNA hypermethylation and prevent excessive cell proliferation (Ning et al., 2020), and the *Arabidopsis SOL1* and *SOL2* are required for efficient cell fate transitions in the stomata lineage (Simmons et al., 2019). The existence of multiple paralogs in plant genomes could contribute to different isoforms of the DREAM/MMB complex acting in different developmental contexts.

In animals, disruptions of the DREAM/MMB complex usually lead to cancer. The loss of both retinoblastoma protein (pRb) and Rb-like (p107/p130) induces retinoblastoma in mice (Wu et al., 2017), while overexpression of B-Myb is found in many cancers, including breast cancer and colorectal cancer, and is often associated with poor outcomes (Musa et al., 2017). Although plants do not suffer from cancer, plant mutants defective in the DREAM/MMB components exhibit shoot meristem fasciation: an over-proliferation of the SAM. In *Arabidopsis*, the *tso1-1*, an antimorphic mutation in the *Arabidopsis* homolog of LIN54, shows fasciated SAMs, and *tso1-1* mutant flowers fail to differentiate into floral organs, and are therefore sterile (Liu et al., 1997; Sijacic et al., 2011; Wang et al., 2018). Meanwhile, the cells in the *tso1-1* root apical meristem (RAM) exit the cell cycle early, resulting in a short root phenotype, suggesting *TSO1* has different and opposite effects on shoot and root meristems. *tso1-3*, a loss-of-function allele, on the other hand, has weak phenotypes; it develops normal flowers and normal length root but exhibits reduced fertility (Hauser et al., 2000; Sijacic et al., 2011; Wang et al., 2018). In *Arabidopsis*, *SOL2* is highly similar to *TSO1*, not only in sequence but also in expression; *tso1-3; sol2-1* double loss-of-function mutants exhibit a synergistic genetic interaction and a *tso1-1*-like phenotype. Therefore, the *tso1-1* antimorphic allele may inactivate *TSO1* as well as *SOL2* to cause its severe phenotype (Sijacic et al., 2011). These different alleles of *TSO1* in *Arabidopsis* provide a useful tool for dissecting DREAM/MMB function in the context of plant meristem regulation.

To identify genes that may act in the same pathway as *TSO1*, we previously conducted a genetic screen for suppressors of *tso1-1* (Wang et al., 2018). Seeds of *tso1-1* containing an inducible *TSO1* (*35S::TSO1-GR*) were mutagenized. When applied with dexamethasone (DEX), *tso1-1; 35S::TSO1-GR* M1 plants were able to overcome sterility and gave rise to M2 progeny, which were screened for suppressors. Thirty-two suppressors from the screen were found to reside in *MYB3R1*, which encodes one of the five

Department of Cell Biology and Molecular Genetics, University of Maryland, College Park, MD 20742, USA.

\*Present address: Cardiovascular Research Institute, University of California, San Francisco, CA 94143, USA.

‡Author for correspondence (zliu@umd.edu)

ORCID F.W., 0000-0002-2873-7165; Z.L., 0000-0001-9969-9381

Handling Editor: Ykä Helariutta  
Received 27 October 2022; Accepted 6 February 2023

*Arabidopsis* homologs of B-Myb. The work established that the wild-type *TSO1* activity is required to repress *MYB3R1* expression to prevent SAM overproliferation (Wang et al., 2018). However, questions concerning how the *TSO1-MYB3R1* module regulates SAM cell proliferation and how the module interacts with cell cycle machinery remain unanswered.

In this study, we characterized a second suppressor locus of *tso1-1* from the same genetic screen. We showed that mutations in an A-type cyclin named *CYCA3;4* suppressed the abnormal floral organ development, shoot fasciation and sterility of *tso1-1* to certain degrees. Additionally, ectopic and more abundant *CYCA3;4*-GUS proteins were found in *tso1-1* mutant inflorescence, and *CYCA3;4* overexpression enhanced the *tso1-3* phenotype. The work reveals the function of a specific cyclin A in shoot meristem regulation and directly integrates cell cycle machinery with the *TSO1-MYB3R1* regulatory module.

## RESULTS AND DISCUSSION

### A splice-site mutation in *CYCA3;4* suppresses the *tso1-1* shoot phenotype

In order to identify new components of the *TSO1* regulatory pathway, a second suppressor locus, defined by a single allele, *A144*, was analyzed. *A144* suppresses *tso1-1* defects in floral organ differentiation, fertility and shoot meristem size (Fig. 1A). Although *tso1-1* plants develop highly abnormal carpels (Fig. 1A) that lead to no seeds per carpel (Fig. 1B), *tso1-1; A144* double plants form normal carpels (Fig. 1A) that yield 1-10 seeds per silique (Fig. 1B). Furthermore, 100% *tso1-1* mutant shoot meristems are fasciated (Fig. 1B), as shown by more floral buds per inflorescence (Fig. 1A). This meristem fasciation defect of *tso1-1* is completely suppressed in *tso1-1; A144* double mutants (Fig. 1A,B). In the weaker allele of *tso1-3*, even though the carpels develop properly, their fertilities are low, which is indicated by the small siliques; however, *tso1-3; A144*

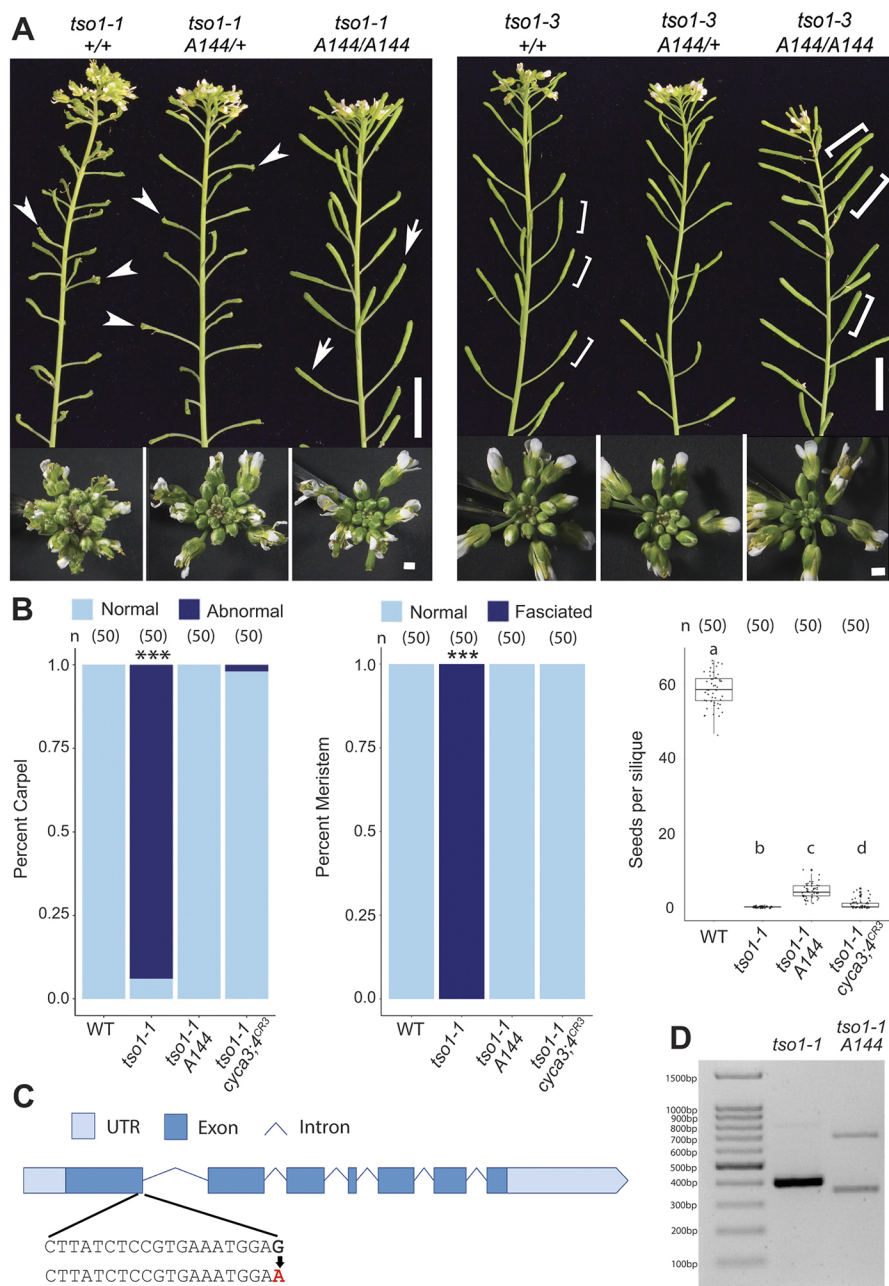

**Fig. 1. A homozygous *A144* mutation suppresses defects of *tso1-1* and *tso1-3*.**

(A) Comparison of inflorescences and siliques among *tso1-1* and *tso1-3* plants heterozygous or homozygous for the *A144* mutation. The top panel illustrates carpel phenotype and silique length. Arrowheads indicate abnormal carpels; arrows indicate fertile siliques. The bottom panel illustrates shoot meristems. All plants containing *tso1-1* also possess the *35S::TSO1-GR* transgene but are not treated with dexamethasone (DEX). *tso1-3* has a weaker defect in fertility (top panel) and a normal SAM (bottom). Homozygous *A144* improves *tso1-3* fertility with longer and fuller siliques (indicated by bracket size). Scale bars: 1 cm (upper panel); 1 mm (lower panel). (B) Quantification of abnormal carpels, meristem fasciation and seeds per silique in different genotypes. The number of carpels, meristems and siliques is indicated in parenthesis. \*\*\* $P < 0.001$  compared with other genotypes (unpaired, two-tailed  $t$ -test). a-d indicate significance differences in each comparison ( $P < 0.001$ ; unpaired, two-tailed  $t$ -test). In the box plot, the horizontal lines indicate the medians, and the whiskers indicate maximum and minimum values. *cyca3;4<sup>CR3</sup>* is a CRISPR-edited new allele of *CYCA3;4* detailed in Fig. 2. (C) Gene model of *CYCA3;4*. The G-to-A mutation is highlighted in red. (D) RT-PCR showing two aberrant transcripts in *tso1-1; A144* double mutants.



double mutants form longer siliques than *tso1-3* single mutants (Fig. 1A).

To isolate the gene defined by the *A144* suppressor, a F2 mapping population was created and sequenced. Using the SIMPLE mapping pipeline (Wachsmann et al., 2017), *A144* was mapped to an A-type cyclin gene *CYCA3;4* on chromosome 1 (Fig. S1). A G-to-A mutation occurs in the last nucleotide of the first exon of *CYCA3;4* and is synonymous (E-to-E) (Fig. 1C). RT-PCR was used to examine whether this mutation affects the splicing of *CYCA3;4* transcripts. A *CYCA3;4* transcript of wild-type size was not detected in the *A144* plants, but two transcripts of aberrant sizes were detected (Fig. 1D). Sequence analysis of the RT-PCR products showed that the longer aberrant transcript retained the first intron whereas the shorter aberrant transcript used a cryptic splice donor site in the first exon. As both the aberrant transcripts contained premature stop codons, *A144* likely caused a non-functional *CYCA3;4*.

### CRISPR/Cas9-mediated knockouts of *CYCA3;4* also suppress *tso1-1*

To confirm that the mutated *CYCA3;4* is indeed the causal mutation for *A144*, we conducted both complementation tests and CRISPR/Cas9 knockout of *CYCA3;4*. The genomic sequence of *CYCA3;4* (g*CYCA3;4*; from ~1.4 kb upstream to the end of 3'UTR) was transformed into the *A144* plants containing the *tso1-1* mutation. If the transgene rescues *A144*, the resulting transgenic plants should regain the *tso1-1* mutant phenotype, which was indeed observed, including meristem fasciation and complete sterility (Fig. S2). Second, a CRISPR/Cas9 construct with a gRNA targeting the first exon of *CYCA3;4* was transformed into *tso1-1*; *35S::TSO1-GR* plants. Several T<sub>1</sub> plants showed suppressed phenotypes even in the absence of DEX application (Fig. 2A). Sequencing of the *CYCA3;4* locus in these T<sub>1</sub> plants showed either homozygous or biallelic mutations in *CYCA3;4* (Fig. 2E). Detailed characterization of a

*tso1-1*; *cyca3;4*<sup>CR3</sup> homozygous line showed that these mutant plants formed normal shoots and carpels, and developed somewhat elongated siliques containing 0-5 seeds per silique (Fig. 2A,B; Fig. 1B). Therefore, CRISPR-mediated knockouts of *CYCA3;4* also suppress *tso1-1*, although the suppression of fertility, like *A144*, is incomplete. Together, these data strongly support that, in addition to *MYB3R1*, *CYCA3;4* defines a second suppressor locus of *tso1-1*.

CRISPR/Cas9-directed knockout of *CYCA3;4* allowed us to investigate whether the *cyca3;4* mutations could suppress the *tso1-1* short root phenotype without worries of background mutations caused by the EMS mutagenesis. Both *tso1-1* and *tso1-1*; *cyca3;4*<sup>CR3</sup> plants had similar root length, which is shorter than that of wild-type *Ler* (Fig. 2C,D), suggesting that mutations in *CYCA3;4* do not suppress the short root phenotype of *tso1-1*. It remains to be determined whether this tissue-specific suppression of *tso1-1* by the *cyca3;4* mutation is due to tissue-specific function of different members of the *CYCA3* family.

Among the 50 putative cyclin genes in the genome, categorized into *CYCA1-3*, *CYCB1-3*, *CYCC*, *CYCD1-7*, *CYCH*, *CYCL*, *CYCP1-4* and *CYCT* classes (Menges et al., 2005), *CYCA3* genes are believed to govern the G1-S transition and hence resemble the E-type cyclin in animals (Yu et al., 2003). However, the expression profiles of the four *Arabidopsis* *CYCA3s* vary greatly, suggesting potentially diverse functions (Takahashi et al., 2010; Willems et al., 2020). *CYCA3;3* (*AT1G47220*) is a meiosis-specific cyclin (Bulankova et al., 2013), and the transcripts of *CYCA3;1* (*AT5G43080*) and *CYCA3;2* (*AT1G47210*) peak in the G1/S phase (Takahashi et al., 2010). *CYCA3;4* (*AT1G47230*), on the other hand, has been shown to be expressed throughout the cell cycle based on RT-PCR analysis of aphidicolin synchronized cell lines (Takahashi et al., 2010). More recently, *CYCA3;4*-GUS protein accumulation was examined in synchronized root tip by hydroxyurea treatment and shown to accumulate prominently in the G2/M phase (Willems et al., 2020). A loss-of-function *cyca3;4-1*

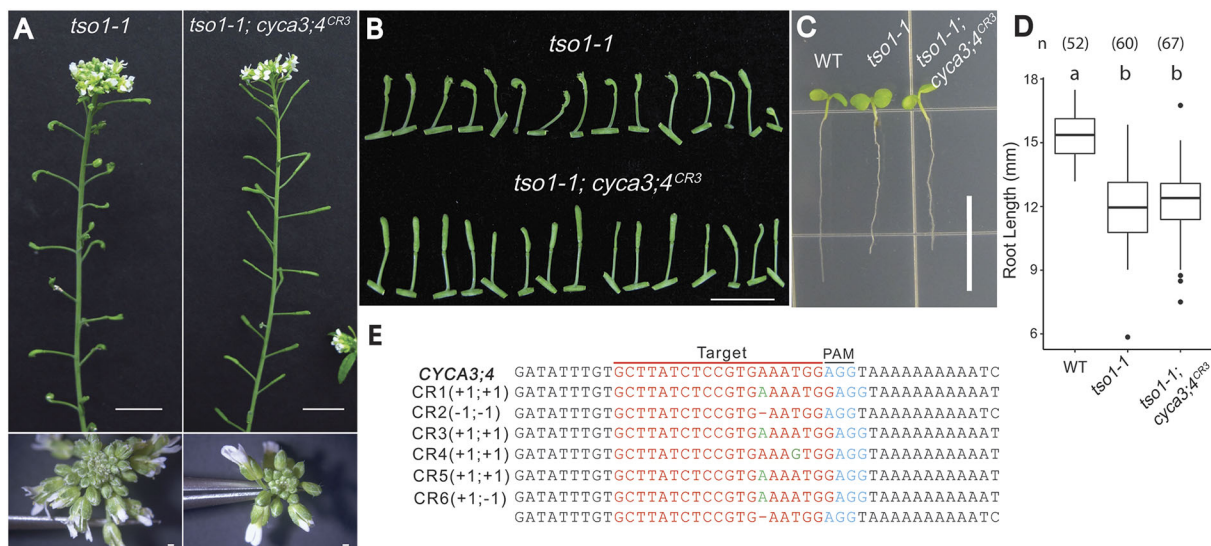

**Fig. 2. CRISPR/Cas9 knockouts of *CYCA3;4* suppress *tso1-1* shoot but not root defects.** (A) Defects of *tso1-1* in proper carpel development (top) and meristem fasciation (bottom) are suppressed by a CRISPR knockout mutation in *CYCA3;4*. (B) A comparison of abnormal carpels of *tso1-1* with short siliques of *tso1-1*; *cyca3;4*<sup>CR3</sup>. The abnormal *tso1-1* carpels could not be fertilized and contained no seed; the *tso1-1*; *cyca3;4*<sup>CR3</sup> carpels were fertilized and formed short siliques with a few seeds inside. (C) *tso1-1* mutants develop short roots in comparison with wild type (*Ler*). A *tso1-1*; *cyca3;4*<sup>CR3</sup> double mutant has a root length similar to that of *tso1-1*. (D) Quantification of root length in different genotypes. The number of examined roots is indicated in parenthesis. A significant difference is indicated between a and b ( $P < 0.001$ ; one-way ANOVA and Tukey's test). The horizontal lines indicate the medians, and the whiskers indicate the maximum and minimum values. (E) CRISPR/CAS9-generated mutant alleles of *CYCA3;4*. Red font indicates the seed RNA; green font indicates insertions, - and + indicate deletion and insertion, respectively; blue font indicates the protospacer adjacent motif (PAM). Scale bars: 1 cm in A (upper images), B and C; 500  $\mu$ m in A (lower images).

was previously identified as a suppressor of *ccs52a-1*, and two T-DNA insertion lines (*cyca3;4-2* and *cyca3;4-3*) showed strong reductions of transcripts but no obvious root or shoot phenotype (Willems et al., 2020). *A144* is therefore named as *cyca3;4-4*.

### CYCA3;4 is misregulated in *tso1-1* mutants

To understand the mechanism of *tso1* suppression by *cyca3;4*, we constructed and analyzed a translational reporter of *CYCA3;4* (*pCYCA3;4-gCYCA3;4-GUS*), where a 1.4 kb promoter plus the coding region of *CYCA3;4* was fused to *GUS*. The construct was transformed into plants heterozygous for *tso1-1*, and seven independent transgenic lines were analyzed. Reporter *GUS* expression was compared among the  $T_2$  siblings from the same  $T_1$  parent; these  $T_2$  siblings are either *tso1-1* or wild type (+/+ or *tso1-1/+*). In the  $T_2$  wild-type inflorescences, light and consistent blue staining was observed in the young floral buds (Fig. 3A,B). At floral stages 9–10, the locules of anthers show intense blue staining (white arrow in Fig. 3A); at stages 10–12, intense staining occurs in ovules inside the gynoecium as well as stigma (see inset of Fig. 3A). Therefore, the *CYCA3;4* protein is at the highest level in actively dividing germ cells. In *tso1-1* mutant inflorescences, young floral buds showed significantly stronger and ectopic *GUS* staining in young floral organ primordia and floral meristems (Fig. 3C,D). In *tso1-1* plants with a strong phenotype, including meristem fasciation and a lack of floral organ differentiation, strong, punctate and ectopic staining were observed in young floral meristems (Fig. 3E,F). As *tso1-1* mutants do not form well differentiated stamen or carpels, we do not see strong blue staining in gynoecium or anthers.

Although *tso1-1* mutant inflorescences showed an increased and ectopic *CYCA3;4-GUS* protein accumulation, we did not observe a corresponding increase in *CYCA3;4* transcript levels in *tso1-1* SAM (Fig. S3), suggesting that the *tso1-1* mutation may affect *CYCA3;4*

protein levels indirectly. Nevertheless, the resulting increased and ectopic *CYCA3;4* protein activity may excessively promote cell proliferation in *tso1-1* mutant inflorescences. A second and distinct interpretation is that the increased and ectopic *CYCA3;4* protein accumulation could be a consequence of *tso1-1* mutant cells that are unable to complete the cell cycle and arrest at cell cycle phases that express *CYCA3;4* proteins. In this second scenario, stronger *CYCA3;4* protein accumulation could be simply a byproduct of the cell division defect of *tso1-1*.

We also compared the *CYCA3;4* reporter expression in the roots. Consistent with previous published data (Willems et al., 2020), the *CYCA3;4-GUS* fusion proteins are located in the meristematic zone and the transition zone in all cell layers (Fig. 3G). In the elongation zone, *CYCA3;4-GUS* fusion is restricted in the stele. Similar to the wild type, the *CYCA3;4-GUS* fusion proteins are also restricted to the same tissues in *tso1-1* roots (Fig. 3G). However, the meristem zone is compressed in *tso1-1* root. Furthermore, whereas the *CYCA3;4-GUS* proteins are slightly more abundant near the transition zone in the wild-type root (bracketed area in the wild-type root, Fig. 3G), *CYCA3;4-GUS* seems to be more evenly distributed throughout the meristematic zone and lacks a strong staining band at the transition zone (see transition zone marked by arrows, Fig. 3G). In summary, *TSO1* does not seem to repress the *CYCA3;4-GUS* in the root, but may affect its spatial distribution.

### Overexpression of *CYCA3;4* weakly enhances the *tso1-3* fertility defect

If the elevated *CYCA3;4* activity in *tso1-1* is responsible for some of the *tso1-1* mutant phenotypes, overexpressing *CYCA3;4* in the weak *tso1-3* mutants may enhance the *tso1-3* phenotype. To test this, *pUBQ10::CYCA3;4* was introduced into *tso1-3/+* plants and RT-qPCR showed 7- to 16-fold higher expression of *CYCA3;4* in three different *pUBQ10::CYCA3;4* transgenic lines (Fig. S4). *tso1-3*

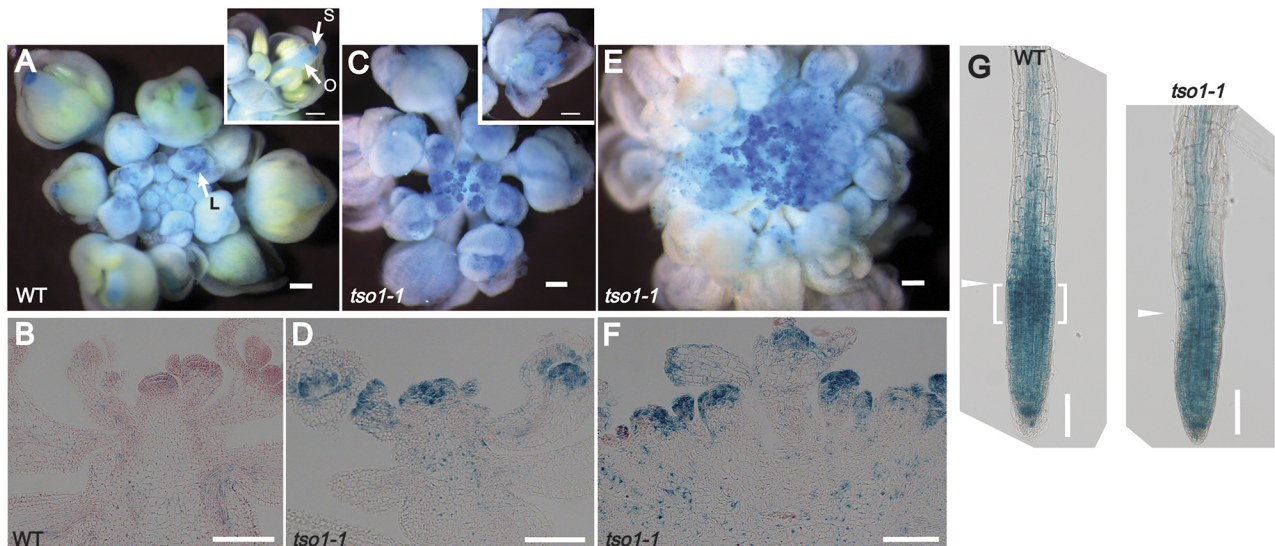

**Fig. 3. *CYCA3;4* translational reporter expression in wild type and *tso1-1*.** (A) The *CYCA3;4-GUS* translational reporter expression (blue) in an inflorescence of a wild-type (*Ler*) transgenic plant. Inset shows a stage 11 flower. Arrows indicate the locule (L) of an anther, stigma (S) and ovules (O). (B) A longitudinal section of the wild-type inflorescence in A. Eosin Y counterstains the tissues in pink. (C) The *CYCA3;4-GUS* translational reporter expression in the inflorescence of a *tso1-1* transgenic plant. Inset is a stage 11 flower. (D) A longitudinal section of the *tso1-1* inflorescence in C with strong and patchy *GUS* staining throughout the young floral meristems and organ primordia. (E) *CYCA3;4-GUS* expression in a fasciated *tso1-1* inflorescence. Significantly more young floral meristems are formed, and all of them are strongly blue. (F) A longitudinal section of the same *tso1-1* inflorescence shown in E. (G) *CYCA3;4-GUS* expression in the root tip of wild type (*Ler*) and *tso1-1* seedlings at 5 days post germination (DPG). Arrowheads indicate the upper boundary of the root apical meristem (RAM) and the brackets indicate a stronger *GUS* staining band at the most distal region of the RAM. Scale bars: 200  $\mu$ m in A, C and E; 100  $\mu$ m in B, D, F and G.



plants containing the *pUBQ10::CYCA3;4* transgene showed a higher number of defective carpels than *tso1-3* plants without the transgene (Fig. 4B,C). Two of the three *tso1-3* transgenic lines also made fewer seeds per silique than *tso1-3* (Fig. 4C). Therefore, overexpressing *CYCA3;4* enhances the floral organ defect and the fertility defect of *tso1-3*.

In contrast to *tso1-3* plants, the inflorescences and carpels of wild-type plants with the *pUBQ10::CYCA3;4* transgene exhibited no abnormal phenotype (Fig. 4A). One possible explanation is that other partners of *CYCA3;4*, which might not be mis-expressed in the wild-type background, are needed in order for *pUBQ10::CYCA3;4* to confer a mutant phenotype. One such partner could be *MYB3R1*. Ectopically expressed *MYB3R1* in *tso1-1* has previously been shown to mediate the majority of the *tso1-1* phenotypes (Wang et al., 2018). The ectopically expressed *MYB3R1* protein in *tso1-1* could rely on *CYCA3;4*-mediated phosphorylation to become functional (Fig. 4D).

### A proposed model

We propose a model that summarizes previous as well as current findings (Fig. 4D). Specifically, *TSO1* acts transcriptionally to prevent *MYB3R1* expression. In *tso1-1* mutants, *MYB3R1* is over- and constitutively expressed, and the constitutive *MYB3R1* activity underlies the *tso1-1* mutant phenotype (Wang et al., 2018). However, in the *tso1-1; cyca3;4* double mutants, the constitutive *MYB3R1* activity is reduced or lost due to an absence of *CYCA3;4* and/or CDK and hence a loss or reduction of phosphorylation of

*MYB3R1*. This explains why merely overexpressing *CYCA3;4* in wild type was insufficient to induce *tso1*-like phenotype (Fig. 4A). This is also supported by our previous experiment (Wang et al., 2018), when we found phosphorylated serine residues at positions 656 and 709 of *MYB3R1* by mining the Arabidopsis Protein Phosphorylation Site Database (PhosPhAt 4.0). Phosphomimics on these two residues showed that *MYB3R1*(S656D) was able to enhance the *tso1-3* fertility defect (Wang et al., 2018). Furthermore, S656, which is immediately followed by PVLDRR, matches the minimal CDK consensus phosphorylation site (S/T-P) (Örd et al., 2019), supporting the possibility that *MYB3R1*-S656 is likely phosphorylated by a CDK. Accordingly, *CDKA;1* could be a partner of *CYCA3;4* based on early research showing that the Arabidopsis *CYCA3;4* can bind *CDKA;1* (Van Leene et al., 2010).

In our proposed model, *TSO1* is shown to repress *CYCA3;4* indirectly. This is because *TSO1* encodes a transcriptional regulator and its impact on *CYCA3;4* protein is likely to be indirect. Future molecular, genetic and biochemical experiments will be necessary to test different aspects of our proposed model.

## MATERIALS AND METHODS

### Plant materials and growth conditions

Plants were grown on soil (Sungrow) under a 16 h light/8 h dark cycle at 20°C. All mutants used are in Landsberg *erecta* (*Ler*) background. *tso1-1*, *tso1-3* and plants heterozygous for *tso1-1* or *tso1-3* (*tso1-1* +/+ *sup-5* and *tso1-3* +/+ *sup-5*) have been described previously (Hauser et al., 1998; Liu et al., 1997; Sijacic et al., 2011; Wang et al., 2018). *cyca3;4-4* (A144) was

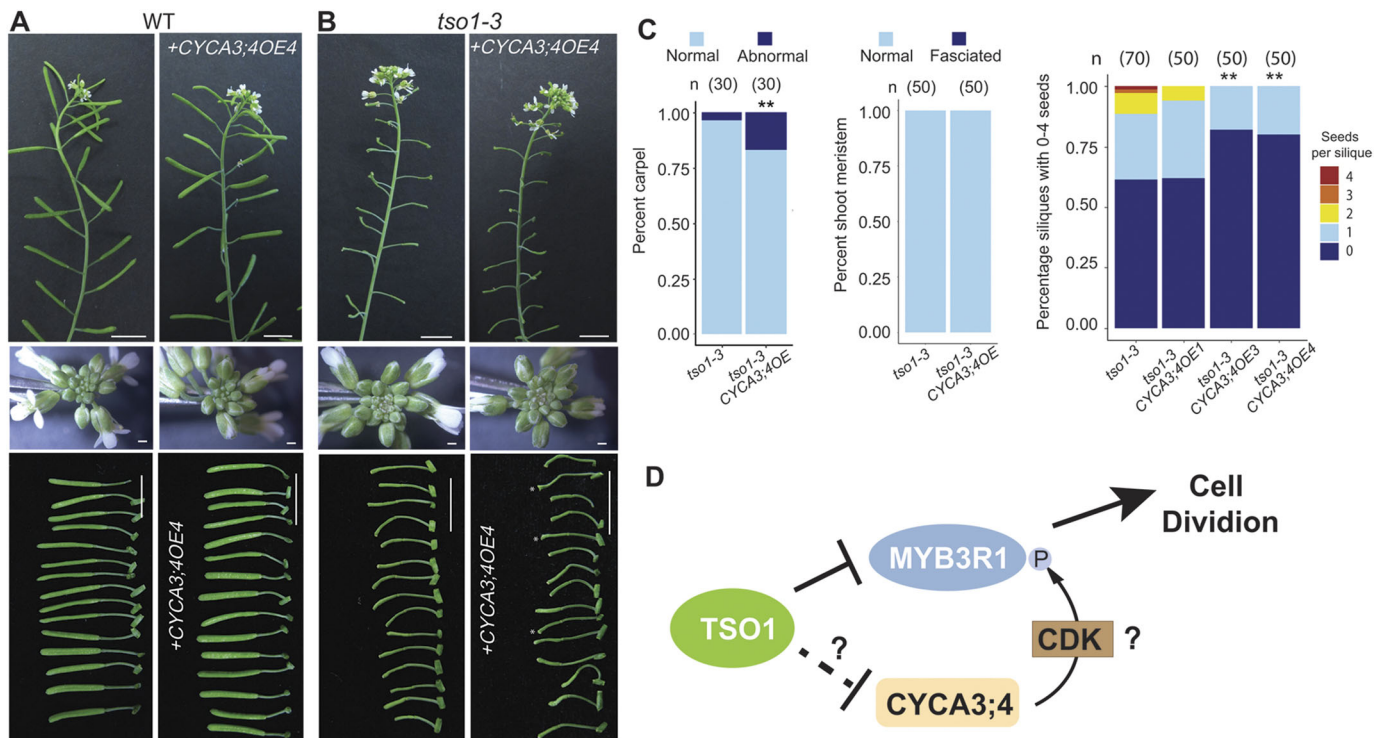

**Fig. 4. Overexpression of *CYCA3;4* enhances *tso1-3* fertility defects.** (A) Wild-type (*Ler*) plants with or without the *CYCA3;4* overexpressing transgene. Transgenic line *CYCA3;4OE4* is shown. (B) *tso1-3* plants with or without the *CYCA3;4* overexpressing transgene. Transgenic line *CYCA3;4OE4* is shown. Abnormal carpels are marked with asterisks. Scale bars: 1 cm (top and bottom rows); 500  $\mu$ m (middle row). (C) Quantification of carpel, meristem and silique phenotypes in *tso1-3; CYCA3;4* overexpressing transgenic lines in comparison with *tso1-3*. Numbers in parentheses indicate the number of carpels, shoots and siliques that were scored. The carpel graph is from *CYCA3;4OE3* and *CYCA3;4OE4* transgenic lines combined; the meristem graph is derived from *CYCA3;4OE4*. \*\* $P < 0.05$  (unpaired, two-tailed *t*-test for carpel and one-way ANOVA and Tukey's test for silique). (D) A proposed *TSO1* regulatory network, where *TSO1* limits cell division in the SAM by repressing the expression of *MYB3R1* and *CYCA3;4* protein. At the same time, *CYCA3;4*, together with CDK, may activate *MYB3R1* through phosphorylation. The dotted line implies indirect regulation. The question marks indicate the need for experimental support. Arrows indicate positive regulation; bars indicate negative regulation.

isolated from an EMS mutagenesis screen of *tso1-1*; *35S::TSO1-GR* (Wang et al., 2018).

### Constructs and transformation

All constructs were transformed through floral dip using *Agrobacterium* strain GV3101. All sequences were cloned from *Ler*. All relevant primers are listed in Table S1.

For the complementation test construct, the genomic sequence of *CYCA3;4* (from the start of the 5'UTR to the end of the 3'UTR plus ~1.4 kb upstream of the 5'UTR) was PCR amplified with primers (Table S1), cloned into pCR8/GW/TOPO and LR-recombined into pMDC99 (Curtis and Grossniklaus, 2003).

For the CRISPR/Cas9 construct targeting *CYCA3;4*, the crRNA was designed using the website [crispr.dbcsls.jp/](http://crispr.dbcsls.jp/). Two 19 nucleotide guide sequences (Table S1) were chosen as they had no off-target sites. crRNA1 and crRNA2, respectively, target the first few nucleotides and the last few nucleotides of the first exon. To introduce the two crRNAs into the pHEE401E vector (Wang et al., 2015), cloning PCR was carried out using the pCBT-DT1T2 vector as the template and the PCR product containing the two crRNAs was introduced into pHEE401E via Gibson assembly (Gibson et al., 2009). The construct was transformed into *tso1-1*; *35S::TSO1-GR* plants. Only crRNA2 was able to generate successful knockout of *CYCA3;4*. No dexamethasone (DEX) was applied when analyzing the phenotype of the transgenic plants.

A 1.4 kb promoter sequence of *CYCA3;4* plus the genomic sequence of *CYCA3;4* (from the start of 5'UTR to the end of the coding region) were cloned into pCR8/GW/TOPO and recombined into pMDC162 (Curtis and Grossniklaus, 2003) to make the *pCYCA3;4::CYCA3;4-GUS* translational fusion. The construct was transformed into *tso1-1* *+/+* *sup-5* plants. Seven independent transgenic lines were analyzed. GUS expression pattern was compared between wild-type and *tso1-1* T2 sibling plants derived from the same T<sub>1</sub> parent (*tso1-1* *+/+* *sup-5*).

To overexpress *CYCA3;4*, the *Arabidopsis UBQ10* promoter was cloned from the JH23 vector (Zhou et al., 2021) and used to drive full-length cDNA of *CYCA3;4* (*pUBQ10::CYCA3;4*). *pUBQ10::CYCA3;4* was first cloned into pCR8/GW/TOPO by Gibson assembly and LR recombined into pEarleyGate301 (Earley et al., 2006). *pUBQ10::CYCA3;4* was introduced into *agrobacterium* GV3101 and used to floral dip *tso1-3* *+/+* *sup-5* plants. T<sub>2</sub> plants from three independent transgenic lines, 1, 3 and 4, were further analyzed and ~11 plants per line were scored for phenotypes.

### Mapping by sequencing

The mapping population was created by crossing *A144* (in the *tso1-1*; *35S::TSO1-GR* background) with the parent plant (*+/+*, *tso1-1*; *35S::TSO1-GR*). Leaf tissues were collected and pooled from 34 suppressed F<sub>2</sub> plants and 50 unsuppressed F<sub>2</sub> plants, respectively. Genomic DNAs were extracted using the NucleoSpin Plant II Midi Kit (Macherey-Nagel) and then sent for Illumina sequencing (PE-150). The sequencing depth of the suppressed plants was 202 folds. The sequencing depth of the unsuppressed group was 95 folds. The SIMPLE pipeline (Wachsman et al., 2017) was employed for mapping *A144* with default settings.

### Root assay

The seeds were sterilized with 70% ethanol and 10% bleach, and then kept in water at 4°C in the dark for 2 days, after which the seeds were planted on ½ MS (RPI) medium and allowed to germinate under dim light environment for 2 days. Once germinated, they were transferred to the growth chamber. Five days post-germination (DPG) roots were used for quantification.

### GUS staining and sectioning

Inflorescences or 5 DPG seedlings were soaked in 90% acetone for 20 min at room temperature, followed by three washes of staining buffer [0.2% Triton X-100, 50 mM NaHPO<sub>4</sub> Buffer (pH 7.2), 2 mM potassium ferrocyanide, 2 mM potassium ferricyanide]. They were then stained in a buffer with 2 mM X-Gluc for 3 to 3.5 h. Tissues were cleared with an ethanol series (20%, 35% and 50%) and then stored in 70% ethanol at 4°C before imaging. Subsequently, tissues were embedded and sectioned based on a published protocol (Hollender et al., 2012). Imaging was performed with Zeiss LSM980 and Zeiss Stemi SV 6.

### Sample collection, RNA extraction and RT-qPCR

For *tso1-3* and *pUBQ10::CYCA3;4* individual transgenic lines, the whole inflorescence (three inflorescences per biological replicate, two biological replicates per genotype) were collected. For wild type (*L-er*), *tso1-1* and *tso1-1*; *myb3r1-9* (both *tso1-1* and *tso1-1*; *myb3r1-9* possess *35S::TSO1-GR* but no DEX treatment), SAMs were dissected and pooled (15-25 SAMs per biological replicate and four biological replicates per genotype).

RNA was extracted with the RNeasy Mini Kit (Qiagen) and cleaned with DNase I or ezDNase (Invitrogen). cDNAs were synthesized using RevertAid First Strand cDNA Synthesis Kit (Thermo Fisher Scientific) or SuperScript IV VILO Master Mix (Invitrogen). RT-qPCR experiments were performed on the Bio-Rad CFX 96 machine with PowerUp SYBR Green Master Mix (Thermo Fisher Scientific). Each biological replicate was analyzed in three technical replicates. The *TIP41* (*AT4G34270*) gene was the internal control for RT-qPCR of *CYCA3;4* overexpressing lines. The *PP2AA3* (*AT1G13320*) gene was used as the internal control for all other RT-qPCR. Primers are provided in Table S1.

### Acknowledgements

We thank Dr. Umeda for their collaborative efforts, Amy Beavan at the Department of Cell Biology and Molecular Genetics Imaging Core for assistance with the Zeiss LSM980, and Dirk Joldersma for critical reading of the manuscript. Some of the text and figures in this paper formed part of F.W.'s PhD thesis in the Department of Cell Biology and Molecular Genetics at the University of Maryland in 2022.

### Competing interests

The authors declare no competing or financial interests.

### Author contributions

Conceptualization: F.W., W.W., Z.L.; Investigation: F.W., W.W.; Writing - original draft: F.W.; Writing - review & editing: F.W., Z.L.; Supervision: Z.L.; Funding acquisition: F.W., Z.L.

### Funding

This work was supported by a Dean's fellowship from the University of Maryland and by an Ann G. Wylie Dissertation Fellowship to F.W. The work was previously supported by the National Science Foundation (MCB0951460 to Z.L.).

### Data availability

All relevant data can be found within the article and its supplementary information.

### Peer review history

The peer review history is available online at <https://journals.biologists.com/dev/lookup/doi/10.1242/dev.201405.reviewer-comments.pdf>

### References

- Andersen, S. U., Algreen-Petersen, R. G., Hoedl, M., Jurkiewicz, A., Cvitanich, C., Braunschweig, U., Schauser, L., Oh, S.-A., Twell, D. and Jensen, E. Ø. (2007). The conserved cysteine-rich domain of a tesmin/TSO1-like protein binds zinc in vitro and TSO1 is required for both male and female fertility in *Arabidopsis thaliana*. *J. Exp. Bot.* **58**, 3657-3670. doi:10.1093/jxb/erm215
- Bulankova, P., Akimcheva, S., Fellner, N. and Riha, K. (2013). Identification of *Arabidopsis* meiotic cyclins reveals functional diversification among plant cyclin genes. *PLoS Genet.* **9**, e1003508. doi:10.1371/journal.pgen.1003508
- Curtis, M. D. and Grossniklaus, U. (2003). A gateway cloning vector set for high-throughput functional analysis of genes in *planta*. *Plant Physiol.* **133**, 462-469. doi:10.1104/pp.103.027979
- Earley, K. W., Haag, J. R., Pontes, O., Opper, K., Juehne, T., Song, K. and Pikaard, C. S. (2006). Gateway-compatible vectors for plant functional genomics and proteomics. *Plant J.* **45**, 616-629. doi:10.1111/j.1365-3113.2005.02617.x
- Fischer, M. and Müller, G. A. (2017). Cell cycle transcription control: DREAM/MuvB and RB-E2F complexes. *Crit. Rev. Biochem. Mol. Biol.* **52**, 638-662. doi:10.1080/10409238.2017.1360836
- Gibson, D. G., Young, L., Chuang, R.-Y., Venter, J. C., Hutchison, C. A. and Smith, H. O. (2009). Enzymatic assembly of DNA molecules up to several hundred kilobases. *Nat. Methods* **6**, 343-345. doi:10.1038/nmeth.1318
- Hauser, B. A., Villanueva, J. M. and Gasser, C. S. (1998). *Arabidopsis* TSO1 regulates directional processes in cells during floral organogenesis. *Genetics* **150**, 411-423. doi:10.1093/genetics/150.1.411

- Hauser, B. A., He, J. Q., Park, S. O. and Gasser, C. S.** (2000). TSO1 is a novel protein that modulates cytokinesis and cell expansion in Arabidopsis. *Development* **127**, 2219-2226. doi:10.1242/dev.127.10.2219
- Hollender, C. A., Geretz, A. C., Slovins, J. P. and Liu, Z.** (2012). Flower and early fruit development in a diploid strawberry, *Fragaria vesca*. *Planta* **235**, 1123-1139. doi:10.1007/s00425-011-1562-1
- Kobayashi, K., Suzuki, T., Iwata, E., Nakamichi, N., Suzuki, T., Chen, P., Ohtani, M., Ishida, T., Hosoya, H., Müller, S. et al.** (2015). Transcriptional repression by MYB3R proteins regulates plant organ growth. *EMBO J.* **34**, 1992-2007. doi:10.15252/embj.201490899
- Lang, L., Pettkó-Szandtner, A., Elbaşı, H. T., Takatsuka, H., Nomoto, Y., Zaki, A., Dorokhov, S., Jaeger, G. D., Eeckhout, D., Ito, M. et al.** (2021). The DREAM complex represses growth in response to DNA damage in Arabidopsis. *Life Sci. Alliance* **4**, e202101141. doi:10.26508/lsa.202101141
- Liu, Z., Running, M. P. and Meyerowitz, E. M.** (1997). TSO1 functions in cell division during Arabidopsis flower development. *Development* **124**, 665-672. doi:10.1242/dev.124.3.665
- Menges, M., De Jager, S. M., Gruissem, W. and Murray, J. A. H.** (2005). Global analysis of the core cell cycle regulators of Arabidopsis identifies novel genes, reveals multiple and highly specific profiles of expression and provides a coherent model for plant cell cycle control. *Plant J.* **41**, 546-566. doi:10.1111/j.1365-313X.2004.02319.x
- Musa, J., Aynaud, M.-M., Mirabeau, O., Delattre, O. and Grünwald, T. G.** (2017). MYBL2 (B-Myb): a central regulator of cell proliferation, cell survival and differentiation involved in tumorigenesis. *Cell Death Dis.* **8**, e2895. doi:10.1038/cddis.2017.244
- Ning, Y.-Q., Liu, N., Lan, K.-K., Su, Y.-N., Li, L., Chen, S. and He, X.-J.** (2020). DREAM complex suppresses DNA methylation maintenance genes and precludes DNA hypermethylation. *Nat. Plants* **6**, 942-956. doi:10.1038/s41477-020-0710-7
- Örd, M., Möll, K., Agerova, A., Kivi, R., Faustova, I., Venta, R., Valk, E. and Loog, M.** (2019). Multisite phosphorylation code of CDK. *Nat. Struct. Mol. Biol.* **26**, 649-658. doi:10.1038/s41594-019-0256-4
- Sadasivam, S. and DeCaprio, J. A.** (2013). The DREAM complex: master coordinator of cell cycle-dependent gene expression. *Nat. Rev. Cancer* **13**, 585-595. doi:10.1038/nrc3556
- Sijacic, P., Wang, W. and Liu, Z.** (2011). Recessive Antimorphic Alleles Overcome Functionally Redundant Loci to Reveal TSO1 Function in Arabidopsis Flowers and Meristems. *PLoS Genet.* **7**, e1002352. doi:10.1371/journal.pgen.1002352
- Simmons, A. R., Davies, K. A., Wang, W., Liu, Z. and Bergmann, D. C.** (2019). SOL1 and SOL2 regulate fate transition and cell divisions in the Arabidopsis stomatal lineage. *Development* **146**, dev171066. doi:10.1242/dev.171066
- Song, J. Y., Leung, T., Ehler, L. K., Wang, C. and Liu, Z.** (2000). Regulation of meristem organization and cell division by TSO1, an Arabidopsis gene with cysteine-rich repeats. *Development* **127**, 2207-2217. doi:10.1242/dev.127.10.2207
- Takahashi, I., Kojima, S., Sakaguchi, N., Umeda-Hara, C. and Umeda, M.** (2010). Two Arabidopsis cyclin A3s possess G1 cyclin-like features. *Plant Cell Rep.* **29**, 307-315. doi:10.1007/s00299-010-0817-9
- Van Leene, J., Hollunder, J., Eeckhout, D., Persiau, G., Van De Slijke, E., Stals, H., Van Isterdael, G., Verkest, A., Neiryneck, S., Buffel, Y. et al.** (2010). Targeted interactomics reveals a complex core cell cycle machinery in Arabidopsis thaliana. *Mol. Syst. Biol.* **6**, 397. doi:10.1038/msb.2010.53
- Wachsman, G., Modliszewski, J. L., Valdes, M. and Benfey, P. N.** (2017). A SIMPLE pipeline for mapping point mutations. *Plant Physiol.* **174**, 1307-1313. doi:10.1104/pp.17.00415
- Wang, Z.-P., Xing, H.-L., Dong, L., Zhang, H.-Y., Han, C.-Y., Wang, X.-C. and Chen, Q.-J.** (2015). Egg cell-specific promoter-controlled CRISPR/Cas9 efficiently generates homozygous mutants for multiple target genes in Arabidopsis in a single generation. *Genome Biol.* **16**, 144. doi:10.1186/s13059-015-0715-0
- Wang, W., Sijacic, P., Xu, P., Lian, H. and Liu, Z.** (2018). Arabidopsis TSO1 and MYB3R1 form a regulatory module to coordinate cell proliferation with differentiation in shoot and root. *Proc. Natl. Acad. Sci. USA* **115**, E3045-E3054.
- Willems, A., Heyman, J., Eekhout, T., Achon, I., Pedroza-Garcia, J. A., Zhu, T., Li, L., Vercauteren, I., Daele, V. d., van de Cotte, H.** (2020). The cyclin CYCA3;4 is a postprophase target of the APC/CCCS52A2 E3-ligase controlling formative cell divisions in Arabidopsis. *Plant Cell* **32**, 2979-2996. doi:10.1105/tpc.20.00208
- Wu, N., Jia, D., Bates, B., Basom, R., Eberhart, C. G. and MacPherson, D.** (2017). A mouse model of MYCN-driven retinoblastoma reveals MYCN-independent tumor reemergence. *J. Clin. Invest.* **127**, 888-898. doi:10.1172/JCI88508
- Yu, Y., Steinmetz, A., Meyer, D., Brown, S. and Shen, W.-H.** (2003). The tobacco a-type cyclin, Nicta;CYCA3;2, at the nexus of cell division and differentiation. *Plant Cell* **15**, 2763-2777. doi:10.1105/tpc.015990
- Zhou, J., Sittmann, J., Guo, L., Xiao, Y., Huang, X., Pulapaka, A. and Liu, Z.** (2021). Gibberellin and auxin signaling genes RGA1 and ARF8 repress accessory fruit initiation in diploid strawberry. *Plant Physiol.* **185**, 1059-1075. doi:10.1093/plphys/kiab087
